# Supplementary material for: HPV molecular detection from urine versus cervical samples: an alternative for HPV screening in indigenous populations
Source: PeerJ. 2021 Jun 17;9:e11564. doi: 10.7717/peerj.11564 (PMC8214846; doi:10.7717/peerj.11564)
Supplement: Supplemental Information 2 [file peerj-09-11564-s002.xlsx]

## Sheet: Hoja1
folio	age	BMI_cat	cIVIL_STATUS	PARTNERS	partners_cond	Birth	coparas	misbirth	caesarean_operation	alcohol	exercise	Pap_previous	Diabetes	Hypertension	ph	koh	Cytological_diagnosis	HPV_from_cervix	Class_HPVc	Viral_infection_type	VPH_orina	Class_HPVor	GRUPO_DE_VPH_orina	DNA_Concentration_Urin	DNA_Purity_Urin	SEDIMENT	Density	PH	LEUCOS	NITRITES	PROTEINS	CETONES	ERYTHROCYTES	HEMOGLOBIN	Urin_Density_cat	Leucoscat	Prot_cat	Gluc_cat	ERIHEMO_Cat	SexualPartCod2	BirthCod2	misbirth_codif2	Caesareancodif2	Menarche	MenarCat
P-085	70	Obesity 2	married	1	1	7	3 or more	0	0	Yes	No	Yes	No	No	2021-06-05	NEGATIVE	Non-lesion	Negativo	Neg	No infection	51	HPV-HR	only one virus type	647.2	0.66	ABUNDANT	1.01	5	75 leu	NEGATIVE	NEGATIVE	NEGATIVE	NEGATIVE	NEGATIVE	1.01-1.02	Positive	Negative	Negative	Negative	One	two or more	0	zero	14	14 years old or minus
P-082	33	Obesity 2	married	1	1	2	1 a 2	0	0	Yes	No	Yes	No	No	2021-06-05	NEGATIVE	Non-lesion	Negativo	Neg	No infection	16	HPV-HR	only one virus type	68.8	1.08	ABUNDANT	1.01	6	Negativo	NEGATIVE	NEGATIVE	NEGATIVE	NEGATIVE	NEGATIVE	1.01-1.02	Negative	Negative	Negative	Negative	One	two or more	0	zero	15	15 years old or more
P-094	63	Obesity 1	widow	1	1	5	3 or more	0	0	Yes	No	Yes	No	No	2021-06-05	NEGATIVE	Non-lesion	Negativo	Neg	No infection	16,51	IM_HPV-HR	multiple infection	113.9	0.53	ABUNDANT	1.02	5	Negativo	NEGATIVE	NEGATIVE	NEGATIVE	50 ERY/MICROLITRE	5-10 ERY/MICROLITRE	1.01-1.02	Negative	Negative	Negative	Positive	One	two or more	0	zero	13	14 years old or minus
P-097	19	Obesity 1	spouse	1	1	1	1 a 2	0	1	No	No	No	No	No	2021-06-05	NEGATIVE	Non-lesion	Negativo	Neg	No infection	70	HPV-HR	only one virus type	342.4	1.81	ABUNDANT	1.01	6	75 leu	NEGATIVE	30 MG/DL	NEGATIVE	NEGATIVE	NEGATIVE	1.01-1.02	Positive	Positive	Negative	Negative	One	one	0	one	13	14 years old or minus
P-008	53	Obesity 2	spouse	1	1	3	3 or more	1	0	No	Yes	Yes	Yes	Yes	2021-06-05	NEGATIVE	Non-lesion	70	HPV-HR	only one virus type	70	HPV-HR	only one virus type	34.3	1.46	ABUNDANT	1.01	6	Negativo	NEGATIVE	NEGATIVE	NEGATIVE	NEGATIVE	NEGATIVE	1.01-1.02	Negative	Negative	Negative	Negative	One	two or more	1	zero	13	14 years old or minus
P-028	59	Normal	widow	1	1	9	3 or more	0	0	No	No	Yes	No	No	2021-06-05	NEGATIVE	Non-lesion	Negativo	Neg	No infection	39,59,68	IM_HPV-HR	multiple infection	78.5	1.54	ABUNDANT	1.015	5	Negativo	NEGATIVE	NEGATIVE	NEGATIVE	NEGATIVE	NEGATIVE	1.01-1.02	Negative	Negative	Negative	Negative	One	two or more	0	zero	12	14 years old or minus
P-033	48	overweight	married	1	1	4	3 or more	0	0	Yes	No	Yes	Yes	No	2021-06-05	NEGATIVE	Non-lesion	Negativo	Neg	No infection	Negativo	Neg	No infection	16899.1	1.83	ABUNDANT	1.01	5	Negativo	NEGATIVE	30 MG/DL	NEGATIVE	NEGATIVE	NEGATIVE	1.01-1.02	Negative	Positive	Positive	Negative	One	two or more	0	zero	12	14 years old or minus
FSB-1577	39	Normal	no data	2	2021-03-02	2	1 a 2	1	1	No	No	Yes			2021-06-05	NEGATIVE	Non-lesion	Negativo	Neg	No infection	53	HPV-HR	only one virus type	70.4	1.91	Scarce	1.01	6	Negativo	NEGATIVE	NEGATIVE	NEGATIVE	NEGATIVE	NEGATIVE	1.01-1.02	Negative	Negative	Negative	Negative	two or more	two or more	1	one	12	14 years old or minus
P-108	55	overweight	married	1	1	8	3 or more	0	0	Yes	No	Yes	No	No	7 or more	NEGATIVE	Non-lesion	Negativo	Neg	No infection	Negativo	Neg	No infection	31	1.44	ABUNDANT	1.02	5	Negativo	NEGATIVE	NEGATIVE	NEGATIVE	NEGATIVE	NEGATIVE	1.01-1.02	Negative	Negative	Negative	Negative	One	two or more	0	zero	12	14 years old or minus
P-049	51	Obesity 1	married	1	1	8	3 or more	0	0	Yes	Yes	Yes	No	No	2021-06-05	NEGATIVE	Non-lesion	Negativo	Neg	No infection	16	HPV-HR	only one virus type	1022.4	0.39	ABUNDANT	1.025	5	Negativo	NEGATIVE	30 MG/DL	NEGATIVE	50 ERY/MICROLITRE	5-10 ERY/MICROLITRE	>1.02	Negative	Positive	Positive	Positive	One	two or more	0	zero	12	14 years old or minus
P-07-CHIL	55	overweight	no data	2	2021-03-02	2	1 a 2	0	0	Yes	No	Yes			2021-06-05	POSITIVE	Non-lesion	NEGATIVO	Neg	No infection	31,58,6,53,66	IM_HPV-LR/HR	multiple infection	310.6	1.74	Scarce	1.02	5	Negativo	NEGATIVE	NEGATIVE	NEGATIVE	NEGATIVE	NEGATIVE	1.01-1.02	Negative	Negative	Negative	Negative	two or more	two or more	0	zero	15	15 years old or more
P-034	78	overweight	married	1	1	7	3 or more	0	0	Yes	No	No	No	No	2021-06-05	POSITIVE	Non-lesion	Negativo	Neg	No infection	X	HPV-X	only one virus type	39.6	1.83	Scarce	1.01	5	Negativo	NEGATIVE	NEGATIVE	NEGATIVE	NEGATIVE	NEGATIVE	1.01-1.02	Negative	Negative	Negative	Negative	One	two or more	0	zero	12	14 years old or minus
P-099	54	overweight	married	1	1	4	3 or more	0	0	No	No	Yes	No	Yes	7 or more	NEGATIVE	Non-lesion	Negativo	Neg	No infection	39	HPV-HR	only one virus type	23.5	1.67	ABUNDANT	1.02	5	Negativo	POSITIVE	30 MG/DL	NEGATIVE	NEGATIVE	NEGATIVE	1.01-1.02	Negative	Positive	Negative	Negative	One	two or more	0	zero	14	14 years old or minus
P-10-CHIL	49	Obesity 1	no data	1	1	0	None	1	2	No	Yes	Yes			2021-06-05	NEGATIVE	Non-lesion	NEGATIVO	Neg	No infection	NEGATIVO	Neg	No infection	753	1.63	Scarce	1.02	5	Negativo	NEGATIVE	NEGATIVE	NEGATIVE	NEGATIVE	NEGATIVE	1.01-1.02	Negative	Negative	Positive	Negative	One	zero	1	two or more	11	14 years old or minus
P-118	52	Obesity 1	widow	1	1	5	3 or more	0	0	No	No	Yes	Yes	No	Undetermined	NEGATIVE	Non-lesion	Negativo	Neg	No infection	Negativo	Neg	No infection	69.4	1.53	Scarce	1.005	6	Negativo	NEGATIVE	NEGATIVE	NEGATIVE	NEGATIVE	NEGATIVE	<1.01	Negative	Negative	Positive	Negative	One	two or more	0	zero	16	15 years old or more
P-066	48	overweight	married	1	1	7	3 or more	0	0	Yes	No	No	Yes	No	2021-06-05	NEGATIVE	Non-lesion	Negativo	Neg	No infection	Negativo	Neg	No infection	11.1	1.86	ABUNDANT	1	6	Negativo	NEGATIVE	NEGATIVE	NEGATIVE	NEGATIVE	NEGATIVE	<1.01	Negative	Negative	Negative	Negative	One	two or more	0	zero	14	14 years old or minus
P-047	61	overweight	married	1	1	10	3 or more	0	0	No	Yes	Yes	Yes	No	7 or more	NEGATIVE	Non-lesion	Negativo	Neg	No infection	X	HPV-X	only one virus type	704	1.9	Scarce	1.015	5	75 leu	NEGATIVE	500 MG/DL	NEGATIVE	NEGATIVE	NEGATIVE	1.01-1.02	Positive	Positive	Positive	Negative	One	two or more	0	zero	12	14 years old or minus
P-050	40	Obesity 1	married	1	1	3	3 or more	0	3	No	No	Yes	Yes	Yes	4 or minus	NEGATIVE	Non-lesion	Negativo	Neg	No infection	35	HPV-HR	only one virus type	203	1.66	Scarce	1.005	7	Negativo	NEGATIVE	NEGATIVE	NEGATIVE	NEGATIVE	NEGATIVE	<1.01	Negative	Negative	Negative	Negative	One	two or more	0	two or more	12	14 years old or minus
P-070	63	Normal	married	1	1	8	3 or more	0	0	No	No	Yes	No	No	7 or more	NEGATIVE	Non-lesion	Negativo	Neg	No infection	39,6,11	IM_HPV-LR/HR	No infection	45.6	1.27	ABUNDANT	1.005	7	Negativo	NEGATIVE	30 MG/DL	NEGATIVE	NEGATIVE	NEGATIVE	<1.01	Negative	Positive	Positive	Negative	One	two or more	0	zero	15	15 years old or more
P-030	46	Obesity 3	married	1	1	2	1 a 2	1	0	No	No	Yes	No	No	4 or minus	NEGATIVE	Non-lesion	Negativo	Neg	No infection	16	HPV-HR	only one virus type	75.3	1.05	ABUNDANT	1.015	5	Negativo	NEGATIVE	NEGATIVE	NEGATIVE	NEGATIVE	NEGATIVE	1.01-1.02	Negative	Negative	Negative	Negative	One	two or more	1	zero	12	14 years old or minus
P-122	49	Obesity 1	married	1	1	2	1 a 2	1	0	Yes	No	No	No	No	2021-06-05	NEGATIVE	Non-lesion	Negativo	Neg	No infection	51,52,82	IM_HPV-HR	multiple infection	28.6	1.44	ABUNDANT	1.01	6	75 leu	NEGATIVE	NEGATIVE	NEGATIVE	NEGATIVE	NEGATIVE	1.01-1.02	Positive	Negative	Negative	Negative	One	two or more	1	zero	12	14 years old or minus
P-027	48	Obesity 1	married	1	1	2	1 a 2	0	0	No	Yes	Yes	No	No	4 or minus	NEGATIVE	Non-lesion	Negativo	Neg	No infection	6	HPV-LR	only one virus type	87	1.18	ABUNDANT	1.01	5	Negativo	NEGATIVE	NEGATIVE	NEGATIVE	NEGATIVE	NEGATIVE	1.01-1.02	Negative	Negative	Negative	Negative	One	two or more	0	zero	11	14 years old or minus
P-098	56	overweight	married	1	1	4	3 or more	0	0	Yes	No	Yes	No	No	7 or more	NEGATIVE	Non-lesion	Negativo	Neg	No infection	16,51,6	IM_HPV-LR/HR	multiple infection	80.6	0.92	Scarce	1.005	6	Negativo	POSITIVE	NEGATIVE	NEGATIVE	NEGATIVE	NEGATIVE	<1.01	Negative	Negative	Negative	Negative	One	two or more	0	zero	12	14 years old or minus
P-105	55	Normal	married	1	1	4	3 or more	0	0	No	No	Yes	No	Yes	2021-06-05	NEGATIVE	Non-lesion	Negativo	Neg	No infection	39,51,56,58,66,06	IM_HPV-LR/HR	multiple infection	19.7	1.13	Scarce	1	7	Negativo	NEGATIVE	30 MG/DL	NEGATIVE	50 ERY/MICROLITRE	5-10 ERY/MICROLITRE	<1.01	Negative	Positive	Negative	Positive	One	two or more	0	zero	14	14 years old or minus
P-038	45	overweight	married	2	2021-03-02	11	3 or more	1	2	No	No	Yes	Yes	No	2021-06-05	POSITIVE	Non-lesion	Negativo	Neg	No infection	Negativo	Neg	No infection	1805.7	1.98	Scarce	1.01	5	Negativo	NEGATIVE	30 MG/DL	NEGATIVE	NEGATIVE	NEGATIVE	1.01-1.02	Negative	Positive	Positive	Negative	two or more	two or more	1	two or more	18	15 years old or more
P-013	55	Normal	single	3	2021-03-02	3	3 or more	0	0	No	Yes	Yes	No	No	2021-06-05	NEGATIVE	Non-lesion	51,58	IM_HPV-HR	multiple infection	Negativo	Neg	No infection	45.9	1.31	ABUNDANT	1.02	6	10 leu	NEGATIVE	NEGATIVE	NEGATIVE	NEGATIVE	NEGATIVE	1.01-1.02	Positive	Negative	Negative	Negative	two or more	two or more	0	zero	12	14 years old or minus
FSB-1574	36	Normal	no data	3	2021-03-02	0	None	0	1	No	No	Yes			2021-06-05	NEGATIVE	Non-lesion	Negativo	Neg	No infection	33,53	IM_HPV-HR	multiple infection	132.6	1.32	Scarce	1.02	5	Negativo	NEGATIVE	NEGATIVE	NEGATIVE	NEGATIVE	NEGATIVE	1.01-1.02	Negative	Negative	Negative	Negative	two or more	zero	0	one	15	15 years old or more
P-079	30	Normal	married	1	1	2	1 a 2	0	2	No	No	No	No	No	2021-06-05	NEGATIVE	Non-lesion	Negativo	Neg	No infection	Negativo	Neg	No infection	18.5	0.57	Scarce	1	7	Negativo	NEGATIVE	NEGATIVE	NEGATIVE	NEGATIVE	NEGATIVE	<1.01	Negative	Negative	Negative	Negative	One	two or more	0	two or more	11	14 years old or minus
P-010	24	Obesity 1	spouse	1	1	1	1 a 2	0	1	No	No	Yes	No	No	2021-06-05	NEGATIVE	Non-lesion	Negativo	Neg	No infection	Negativo	Neg	No infection	37.1	1.51	ABUNDANT	1.01	6	Negativo	NEGATIVE	NEGATIVE	NEGATIVE	NEGATIVE	NEGATIVE	1.01-1.02	Negative	Negative	Negative	Negative	One	one	0	one	13	14 years old or minus
P-024	31	Obesity 1	spouse	1	1	2	1 a 2	0	2	No	Yes	Yes	Yes	No	2021-06-05	POSITIVE	Non-lesion	39,53,68,82,43	IM_HPV-LR/HR	multiple infection	39,68,53,82,43	IM_HPV-LR/HR	multiple infection	386.5	1.76	Scarce	1.015	5	Negativo	NEGATIVE	NEGATIVE	NEGATIVE	NEGATIVE	NEGATIVE	1.01-1.02	Negative	Negative	Positive	Negative	One	two or more	0	two or more	19	15 years old or more
K16	32	overweight	no data	1	1	0	None	0	3	Yes	No	Yes			2021-06-05	POSITIVE	Non-lesion	Negativo	Neg	No infection	45	HPV-HR	only one virus type	254.6	1.8	Scarce	1.01	7	Negativo	NEGATIVE	30 MG/DL	NEGATIVE	NEGATIVE	NEGATIVE	1.01-1.02	Negative	Positive	Negative	Negative	One	zero	0	two or more	13	14 years old or minus
FSB-1580	39	Normal	no data	1	1	0	None	0	3	Yes	No	Yes			7	POSITIVE	Non-lesion	NEGATIVO	Neg	No infection	31,52,59	IM_HPV-HR	multiple infection	368.2	2.06	Scarce	1.015	5	Negativo	NEGATIVE	30 MG/DL	NEGATIVE	NEGATIVE	NEGATIVE	1.01-1.02	Negative	Positive	Negative	Negative	One	zero	0	two or more	13	14 years old or minus
P-130	47	overweight	spouse	2	2021-03-02	1	1 a 2	0	0	Yes	Yes	Yes	No	No	2021-06-05	POSITIVE	LSIL	16,66	IM_HPV-HR	multiple infection	39,66,70	IM_HPV-HR	multiple infection	81.4	1.64	ABUNDANT	1.015	5	Negativo	NEGATIVE	NEGATIVE	NEGATIVE	NEGATIVE	NEGATIVE	1.01-1.02	Negative	Negative	Negative	Negative	two or more	one	0	zero	14	14 years old or minus
P-003	50	Obesity 3	married	1	1	5	3 or more	0	0	Yes	No	Yes	Yes	Yes	2021-06-05	NEGATIVE	LSIL	68	HPV-HR	only one virus type	X	HPV-X	only one virus type	7.8	1.69	ABUNDANT	1.015	6	Negativo	NEGATIVE	NEGATIVE	NEGATIVE	NEGATIVE	NEGATIVE	1.01-1.02	Negative	Negative	Positive	Negative	One	two or more	0	zero	11	14 years old or minus
P-059	47	Obesity 1	married	1	1	1	1 a 2	0	0	Yes	No	Yes	No	No	2021-06-05	POSITIVE	LSIL	61	HPV-LR	only one virus type	39,70	IM_HPV-HR	multiple infection	1512.7	0.43	ABUNDANT	1.02	6	Negativo	NEGATIVE	30 MG/DL	NEGATIVE	NEGATIVE	NEGATIVE	1.01-1.02	Negative	Positive	Negative	Negative	One	one	0	zero	13	14 years old or minus
P-09-CHIL	75	Obesity 1	no data	3	2021-03-02	11	3 or more	0	0	No	Yes	Yes			7 or more	NEGATIVE	LSIL	62	HPV-HR	only one virus type	NO VALIDO	Neg	Invalid	140.8	1.05	ABUNDANT	1.02	5	Negativo	NEGATIVE	30 MG/DL	NEGATIVE	NEGATIVE	NEGATIVE	1.01-1.02	Negative	Positive	Negative	Negative	two or more	two or more	0	zero	16	15 years old or more
P-014	54	Obesity 2	spouse	2	2021-03-02	7	3 or more	1	2	Yes	No	Yes	No	No	2021-06-05	POSITIVE	LSIL	59	HPV-HR	only one virus type	16	HPV-HR	only one virus type	30.5	1.59	ABUNDANT	1.015	5	Negativo	NEGATIVE	NEGATIVE	NEGATIVE	NEGATIVE	NEGATIVE	1.01-1.02	Negative	Negative	Negative	Negative	two or more	two or more	1	two or more	12	14 years old or minus
P-043	51	Normal	married	1	1	0	None	0	0	Yes	No	No	No	No	Undetermined	NEGATIVE	LSIL	56,58	IM_HPV-HR	multiple infection	52,56	IM_HPV-HR	multiple infection	79.3	1.06	Scarce	1.01	6	Negativo	NEGATIVE	NEGATIVE	NEGATIVE	NEGATIVE	NEGATIVE	1.01-1.02	Negative	Negative	Positive	Negative	One	zero	0	zero	12	14 years old or minus
P-036	58	Normal	married	1	1	6	3 or more	0	0	Yes	Yes	Yes	Yes	Yes	2021-06-05	NEGATIVE	LSIL	62	HPV-HR	only one virus type	X	HPV-X	only one virus type	186.4	0.81	ABUNDANT	1.02	6	Negativo	NEGATIVE	30 MG/DL	1+	NEGATIVE	NEGATIVE	1.01-1.02	Negative	Positive	Positive	Negative	One	two or more	0	zero	16	15 years old or more
p-135	50	Normal	Divorcee	2	2021-03-02	3	3 or more	0	0	Yes	No	Yes	No	No	7 or more	POSITIVE	LSIL	31	HPV-HR	only one virus type	39,51,68,73,06	IM_HPV-LR/HR	multiple infection	27.3	1.71	ABUNDANT	1	6	Negativo	NEGATIVE	NEGATIVE	NEGATIVE	NEGATIVE	NEGATIVE	<1.01	Negative	Negative	Negative	Negative	two or more	two or more	0	zero	16	15 years old or more
FSB-1473	36	overweight	no data	6	4 o mas	1	1 a 2	1	0	Yes	No	Yes					LSIL	31,52,58	IM_HPV-HR	multiple infection	31,52,58	IM_HPV-HR	multiple infection	130.8	1.64	Scarce	1.015	5	Negativo	NEGATIVE	NEGATIVE	NEGATIVE	NEGATIVE	NEGATIVE	1.01-1.02	Negative	Negative	Negative	Negative	two or more	one	1	zero	11	14 years old or minus
P-03-CHIL	27	Normal	no data	2	2021-03-02	0	None	2	0	Yes	No	Yes			2021-06-05	NEGATIVE	LSIL	31	HPV-HR	only one virus type	31	HPV-HR	only one virus type	62.7	1.75	Scarce	1.02	5	Negativo	NEGATIVE	NEGATIVE	NEGATIVE	NEGATIVE	NEGATIVE	1.01-1.02	Negative	Negative	Negative	Negative	two or more	zero	2	zero	12	14 years old or minus
P-007	26	Obesity 1	married	1	1	2	1 a 2	0	0	No	No	Yes	No	No	4 or minus	NEGATIVE	LSIL	59	HPV-HR	only one virus type	Negativo	Neg	No infection	121.1	1.28	ABUNDANT	1.015	5	Negativo	NEGATIVE	NEGATIVE	NEGATIVE	NEGATIVE	NEGATIVE	1.01-1.02	Negative	Negative	Negative	Negative	One	two or more	0	zero	11	14 years old or minus
P-018	38	Obesity 1	spouse	1	1	3	3 or more	0	0	No	No	Yes	No	No	4 or minus	NEGATIVE	LSIL	X	HPV-X	only one virus type	Negativo	Neg	No infection	132.1	1.44	ABUNDANT	1.02	7	10 leu	NEGATIVE	NEGATIVE	NEGATIVE	NEGATIVE	NEGATIVE	1.01-1.02	Positive	Negative	Negative	Negative	One	two or more	0	zero	12	14 years old or minus
P-123	27	overweight	spouse	2	2021-03-02	2	1 a 2	0	0	No	No	No	No	No	4 or minus	NEGATIVE	LSIL	58	HPV-HR	only one virus type	58	HPV-HR	only one virus type	26.9	1.37	Scarce	1.015	6	Negativo	NEGATIVE	NEGATIVE	NEGATIVE	NEGATIVE	NEGATIVE	1.01-1.02	Negative	Negative	Negative	Negative	two or more	two or more	0	zero	13	14 years old or minus
P-020	53	Obesity 2	single	no se le pregunto		0	None	1	0	Yes	No	Yes	No	No			LSIL	X	HPV-X	only one virus type	16,52.58	IM_HPV-HR	multiple infection	118.8	1.12	ABUNDANT	1.015	7	Negativo	NEGATIVE	NEGATIVE	NEGATIVE	NEGATIVE	NEGATIVE	1.01-1.02	Negative	Negative	Negative	Negative		zero	1	zero	13	14 years old or minus
P-035	52	Obesity 3	married	1	1	3	3 or more	0	0	No	No	Yes	No	Yes	2021-06-05	NEGATIVE	LSIL	54	HPV-LR	only one virus type	52,11	IM_HPV-LR/HR	multiple infection	14.1	1.75	Scarce	1	6	Negativo	NEGATIVE	NEGATIVE	NEGATIVE	NEGATIVE	NEGATIVE	<1.01	Negative	Negative	Negative	Negative	One	two or more	0	zero	14	14 years old or minus
P-077	53	Obesity 2	married	1	1	5	3 or more	0	0	Yes	No	Yes	No	No	7 or more	NEGATIVE	LSIL	56	HPV-HR	only one virus type	X	HPV-X	only one virus type	3050.4	0.49	ABUNDANT	1.03	5	Negativo	NEGATIVE	NEGATIVE	NEGATIVE	50 ERY/MICROLITRE	5-10 ERY/MICROLITRE	>1.02	Negative	Negative	Negative	Positive	One	two or more	0	zero	13	14 years old or minus
P-089	38	Normal	spouse	1	1	1	1 a 2	0	0	No	No	Yes	Yes	No	2021-06-05	NEGATIVE	LSIL	54	HPV-HR	only one virus type	39,51,54	IM_HPV-LR/HR	multiple infection	112.8	1.35	ABUNDANT	1.015	6	Negativo	NEGATIVE	30 MG/DL	NEGATIVE	NEGATIVE	NEGATIVE	1.01-1.02	Negative	Positive	Positive	Negative	One	one	0	zero	14	14 years old or minus
P-006	57	Obesity 2	married	1	1	8	3 or more	0	0	No	No	Yes	No	No	2021-06-05	NEGATIVE	LSIL	58,89	IM_HPV-HR	multiple infection	X	HPV-X	only one virus type	59.9	1.45	ABUNDANT	1.005	7	Negativo	NEGATIVE	NEGATIVE	NEGATIVE	25 ERY/MICROLITRE	25 ERY/MICROLITRE	<1.01	Negative	Negative	Negative	Positive	One	two or more	0	zero	12	14 years old or minus
P-023	38	Obesity 2	married	2	2021-03-02	2	1 a 2	0	0	Yes	No	Yes	No	No	4 or minus	NEGATIVE	LSIL	52	HPV-HR	only one virus type	39,52,82	IM_HPV-HR	multiple infection	106.7	1.43	Scarce	1.015	5	Negativo	NEGATIVE	NEGATIVE	NEGATIVE	NEGATIVE	NEGATIVE	1.01-1.02	Negative	Negative	Positive	Negative	two or more	two or more	0	zero	12	14 years old or minus
P-11-CHIL	32	overweight	no data	5	4 o mas	3	3 or more	2	0	Yes	No	Yes			2021-06-05	POSITIVE	LSIL	X	HPV-X	only one virus type	6	HPV-LR	only one virus type	279.9	1.6	Scarce	1.02	6	Negativo	NEGATIVE	30 MG/DL	NEGATIVE	NEGATIVE	NEGATIVE	1.01-1.02	Negative	Positive	Negative	Negative	two or more	two or more	2	zero	14	14 years old or minus
P-126	65	overweight	married	1	1	8	3 or more	0	0	No	No	Yes	No	No	2021-06-05	NEGATIVE	LSIL	39,59,54	IM_HPV-LR/HR	multiple infection	33,39,58,66	IM_HPV-HR	multiple infection	20.1	1.19	ABUNDANT	1.015	5	Negativo	NEGATIVE	NEGATIVE	NEGATIVE	NEGATIVE	NEGATIVE	1.01-1.02	Negative	Negative	Negative	Negative	One	two or more	0	zero	13	14 years old or minus
P-104	39	Obesity 1	spouse	2	2021-03-02	4	3 or more	0	0	Yes	No	Yes	No	No	2021-06-05	POSITIVE	LSIL	45	HPV-HR	only one virus type	39,51,52,53,61	IM_HPV-LR/HR	multiple infection	457	1.29	ABUNDANT	1.025	5	Negativo	NEGATIVE	30 MG/DL	NEGATIVE	NEGATIVE	NEGATIVE	>1.02	Negative	Positive	Negative	Negative	two or more	two or more	0	zero	12	14 years old or minus
P-129	59	Obesity 1	married	1	1	5	3 or more	1	0	No	No	Yes	No	No	7 or more	NEGATIVE	LSIL	56	HPV-HR	only one virus type	58,16	IM_HPV-HR	multiple infection	15.4	1.49	ABUNDANT	1.015	5	Negativo	NEGATIVE	NEGATIVE	NEGATIVE	5-10 ERY/MICROLITRE	5-10 ERY/MICROLITRE	1.01-1.02	Negative	Negative	Negative	Positive	One	two or more	1	zero	14	14 years old or minus
P-052	16	Normal	married	1	1	1	1 a 2	0	0	No	No	No	No	No	4 or minus	NEGATIVE	LSIL	66	HPV-HR	only one virus type	X	HPV-X	only one virus type	998.1	0.38	ABUNDANT	1.025	5	Negativo	NEGATIVE	NEGATIVE	NEGATIVE	NEGATIVE	NEGATIVE	>1.02	Negative	Negative	Negative	Negative	One	one	0	zero	14	14 years old or minus
P-012	32	Obesity 1	spouse	2	2021-03-02	2	1 a 2	0	2	No	No	Yes	No	No	2021-06-05	POSITIVE	LSIL	52	HPV-HR	only one virus type	35,52,59,68,44	IM_HPV-LR/HR	multiple infection	395	2	ABUNDANT	1.01	5	75 leu	NEGATIVE	NEGATIVE	NEGATIVE	NEGATIVE	NEGATIVE	1.01-1.02	Positive	Negative	Negative	Negative	two or more	two or more	0	two or more	12	14 years old or minus
P-110	51	Obesity 1	married	1	1	2	1 a 2	0	1	Yes	Yes	Yes	No	No	2021-06-05	NEGATIVE	LSIL	82	HPV-HR	only one virus type	51	HPV-HR	only one virus type	32.3	1.22	ABUNDANT	1.015	5	10 leu	NEGATIVE	30 MG/DL	NEGATIVE	NEGATIVE	NEGATIVE	1.01-1.02	Positive	Positive	Negative	Negative	One	two or more	0	one	14	14 years old or minus
P-009	25	Normal	married	1	1	3	3 or more	0	3	No	Yes	Yes	No	No	4 or minus	NEGATIVE	LSIL	58,62	IM_HPV-HR	multiple infection	62	HPV-HR	only one virus type	55.3	1.28	ABUNDANT	1.015	5	Negativo	POSITIVE	NEGATIVE	NEGATIVE	NEGATIVE	NEGATIVE	1.01-1.02	Negative	Negative	Negative	Negative	One	two or more	0	two or more	15	15 years old or more
p-139	51	Obesity 2	spouse	4	4 o mas	3	3 or more	3	0	No	No	Yes	No	No	2021-06-05	POSITIVE	LSIL	52,40	IM_HPV-LR/HR	multiple infection	31,52	IM_HPV-HR	multiple infection	929.9	1.17	ABUNDANT	1.02	5	500 leu	NEGATIVE	30 MG/DL	NEGATIVE	50 ERY/MICROLITRE	5-10 ERY/MICROLITRE	1.01-1.02	Positive	Positive	Negative	Positive	two or more	two or more	2	zero	13	14 years old or minus
P-08-CHIL	35	overweight	no data	1	1	2	1 a 2	1	1	Yes	Yes	Yes			2021-06-05	NEGATIVE	LSIL	59	HPV-HR	only one virus type	59,44,54	IM_HPV-LR/HR	multiple infection	68.5	1.58	Scarce	1.015	5	Negativo	NEGATIVE	NEGATIVE	NEGATIVE	NEGATIVE	NEGATIVE	1.01-1.02	Negative	Negative	Negative	Negative	One	two or more	1	one	14	14 years old or minus
P-05-CHIL	22	overweight	no data	1	1	0	None	1	0	No	No	Yes			5	NEGATIVE	LSIL	NEGATIVO	Neg	No infection	6	HPV-LR	only one virus type	221.1	2	Scarce	1.01	5	Negativo	NEGATIVE	NEGATIVE	NEGATIVE	NEGATIVE	NEGATIVE	1.01-1.02	Negative	Negative	Negative	Negative	One	zero	1	zero	11	14 years old or minus
P-001	57	Obesity 1	married	2	2021-03-02	3	3 or more	0	0	No	No	Yes	No	No	2021-06-05	NEGATIVE	LSIL	X	HPV-X	only one virus type	35,56	IM_HPV-HR	multiple infection	32.4	1.73	ABUNDANT	1.01	7	Negativo	NEGATIVE	30 MG/DL	NEGATIVE	NEGATIVE	NEGATIVE	1.01-1.02	Negative	Positive	Negative	Negative	two or more	two or more	0	zero	13	14 years old or minus
P-017	57	Obesity 1	married	2	2021-03-02	3	3 or more	0	0	No	No	Yes	No	No	2021-06-05	NEGATIVE	LSIL	X	HPV-X	only one virus type	39,53	IM_HPV-HR	multiple infection	77.8	1.45	ABUNDANT	1.02	6	Negativo	NEGATIVE	30 MG/DL	NEGATIVE	NEGATIVE	NEGATIVE	1.01-1.02	Negative	Positive	Positive	Negative	two or more	two or more	0	zero	10	14 years old or minus
FSB-1584	25	Normal	no data	2	2021-03-02	0	None	0	0	Yes	Yes	No			4 or minus	NEGATIVE	LSIL	X	HPV-X	only one virus type	16	HPV-HR	only one virus type	39.9	1.59	Scarce	1.02	5	Negativo	NEGATIVE	30 MG/DL	NEGATIVE	NEGATIVE	NEGATIVE	1.01-1.02	Negative	Positive	Negative	Negative	two or more	zero	0	zero	13	14 years old or minus
P-037	20	overweight	spouse	1	1	2	1 a 2	0	0	No	Yes	No	Yes	Yes	2021-06-05	NEGATIVE	LSIL	x	HPV-X	only one virus type	18	HPV-HR	only one virus type	2208.6	0.57	ABUNDANT	1.02	5	Negativo	NEGATIVE	NEGATIVE	NEGATIVE	NEGATIVE	NEGATIVE	1.01-1.02	Negative	Negative	Negative	Negative	One	two or more	0	zero	13	14 years old or minus
p-136	25		spouse	2	2021-03-02	3	3 or more	2	0	No	No	Yes	No	No	2021-06-05	NEGATIVE	LSIL	39	HPV-HR	only one virus type	39,51,68,66	IM_HPV-HR	multiple infection	31.8	1.49	ABUNDANT	1.01	5	Negativo	NEGATIVE	30 MG/DL	NEGATIVE	NEGATIVE	NEGATIVE	1.01-1.02	Negative	Positive	Negative	Negative	two or more	two or more	2	zero	13	14 years old or minus
P-120	74	overweight	widow	1	1	10	3 or more	0	0	Yes	No	Yes	No	Yes	2021-06-05	NEGATIVE	LSIL	18,61	IM_HPV-LR/HR	multiple infection	X	HPV-X	only one virus type	157.8	1.41	ABUNDANT	1.025	5	Negativo	NEGATIVE	NEGATIVE	NEGATIVE	NEGATIVE	NEGATIVE	>1.02	Negative	Negative	Negative	Negative	One	two or more	0	zero	12	14 years old or minus
P-02-CHIL	25	Normal	no data	2	2021-03-02	2	1 a 2	0	0	No	No	Yes			2021-06-05	NEGATIVE	LSIL	NEGATIVO	Neg	No infection	6	HPV-LR	only one virus type	230.1	1.88	Scarce	1.015	6	Negativo	NEGATIVE	NEGATIVE	NEGATIVE	NEGATIVE	NEGATIVE	1.01-1.02	Negative	Negative	Negative	Negative	two or more	two or more	0	zero	12	14 years old or minus
P-113	29	Normal	spouse	4	4 o mas	4	3 or more	0	1	Yes	No	Yes	No	No	2021-06-05	NEGATIVE	LSIL	51,58,68	IM_HPV-HR	multiple infection	39,70	IM_HPV-HR	multiple infection	58.7	1.4	ABUNDANT	1.02	5	Negativo	NEGATIVE	NEGATIVE	NEGATIVE	NEGATIVE	NEGATIVE	1.01-1.02	Negative	Negative	Negative	Negative	two or more	two or more	0	one	12	14 years old or minus
P-042	29	Normal	spouse	1	1	1	1 a 2	0	0	No	Yes	Yes	No	No	2021-06-05	POSITIVE	LSIL	6	HPV-LR	only one virus type	Negativo	Neg	No infection	531	1.86	Scarce	1.015	5	Negativo	POSITIVE	NEGATIVE	NEGATIVE	NEGATIVE	NEGATIVE	1.01-1.02	Negative	Negative	Negative	Negative	One	one	0	zero	13	14 years old or minus
P-031	76	Obesity 2	married	1	1	3	3 or more	2	0	No	Yes	Yes	Yes	Yes	7 or more	NEGATIVE	LSIL	59	HPV-HR	only one virus type	X	HPV-X	only one virus type	108.4	0.96	Scarce	1.01	5	75 leu	NEGATIVE	30 MG/DL	NEGATIVE	NEGATIVE	NEGATIVE	1.01-1.02	Positive	Positive	Negative	Negative	One	two or more	2	zero	15	15 years old or more
P-016	46	Obesity 1	single	2	2021-03-02	5	3 or more	0	0	No	No	Yes	No	No	2021-06-05	NEGATIVE	LSIL	51,62	IM_HPV-HR	multiple infection	No valida		Invalid	18.7	1.35	ABUNDANT	1.015	5	Negativo	NEGATIVE	NEGATIVE	NEGATIVE	50 ERY/MICROLITRE	50 ERY/MICROLITRE	1.01-1.02	Negative	Negative	Negative	Positive	two or more	two or more	0	zero	14	14 years old or minus
P-057	64	Normal	widow	1	1	4	3 or more	0	0	No	No	Yes	No	No	2021-06-05	NEGATIVE	LSIL	39	HPV-HR	only one virus type	No valida		Invalid	9.7	1.24	Scarce	1	6	Negativo	NEGATIVE	NEGATIVE	NEGATIVE	250 ERY/MICROLITRE	25 ERY/MICROLITRE	<1.01	Negative	Negative	Negative	Positive	One	two or more	0	zero	14	14 years old or minus
P-005	23	Obesity 1	spouse	1	1	1	1 a 2	0	0	No	No	No	No	No	4 or minus	NEGATIVE	LSIL	52	HPV-HR	only one virus type	Negativo	Neg	No infection	171.8	1.43	ABUNDANT	1.015	5	Negativo	NEGATIVE	NEGATIVE	NEGATIVE	25 ERY/MICROLITRE	25 ERY/MICROLITRE	1.01-1.02	Negative	Negative	Negative	Positive	One	one	0	zero	12	14 years old or minus
P-063	82	Normal	widow	1	1	12	3 or more	0	0	No	No	No	Yes	No	2021-06-05	POSITIVE	LSIL	56,53	IM_HPV-HR	multiple infection	56	HPV-HR	only one virus type	618.4	1.98	ABUNDANT	1.005	7	500 leu	NEGATIVE	NEGATIVE	NEGATIVE	NEGATIVE	NEGATIVE	<1.01	Positive	Negative	Negative	Negative	One	two or more	0	zero	13	14 years old or minus
p-148	37	overweight	married	1	1	4	3 or more	0	1	No	No	Yes	No	No	4 or minus	NEGATIVE	LSIL	51	HPV-HR	only one virus type	39	HPV-HR	only one virus type	16.8	1.6	Scarce	1.005	7	75 leu	NEGATIVE	30 MG/DL	NEGATIVE	NEGATIVE	NEGATIVE	<1.01	Positive	Positive	Negative	Negative	One	two or more	0	one	12	14 years old or minus
FSB-1306	55	Obesity 2	no data	3	2021-03-02	0	None	2	1	No	Yes	Yes			2021-06-05	NEGATIVE	LSIL	52	HPV-HR	only one virus type	16	HPV-HR	only one virus type	554.5	1.83	Scarce	1.02	5	Negativo	POSITIVE	30 MG/DL	NEGATIVE	NEGATIVE	NEGATIVE	1.01-1.02	Negative	Positive	Negative	Negative	two or more	zero	2	one	13	14 years old or minus
p-032	39	overweight	married	1	1	4	3 or more	0	1	Yes	No	Yes	Yes		2021-06-05	NEGATIVE	LSIL	X	HPV-X	only one virus type	Negativo	Neg	No infection	392	1.85	ABUNDANT	1.01	5	75 leu	NEGATIVE	NEGATIVE	NEGATIVE	NEGATIVE	NEGATIVE	1.01-1.02	Positive	Negative	Positive	Negative	One	two or more	0	one	12	14 years old or minus
P-092	56	overweight	married	1	1	4	3 or more	3	0	Yes	Yes	Yes	No	Yes	2021-06-05	POSITIVE	LSIL	31,35,39,52,68,44	IM_HPV-LR/HR	multiple infection	35,52,68,44	IM_HPV-LR/HR	multiple infection	399.4	1.36	ABUNDANT	1.015	7	Negativo	NEGATIVE	NEGATIVE	NEGATIVE	NEGATIVE	NEGATIVE	1.01-1.02	Negative	Negative	Negative	Negative	One	two or more	2	zero	14	14 years old or minus
FSB-1587	22	Obesity 1	no data	2	2021-03-02	0	None	0	0	No	Yes	Yes			2021-06-05	NEGATIVE	LSIL	58,82	IM_HPV-HR	multiple infection	16,39,51,58,59,82,62	IM_HPV-HR	multiple infection	74.7	1.66															two or more	zero	0	zero	12	14 years old or minus
p-143	25	Normal	spouse	2	2021-03-02	2	1 a 2	1	2	Yes	Yes	Yes	No	No	2021-06-05	NEGATIVE	LSIL	16	HPV-HR	only one virus type	16,66,70	IM_HPV-HR	multiple infection	52.7	1.59	ABUNDANT	1.01	6	Negativo	POSITIVE	30 MG/DL	NEGATIVE	NEGATIVE	NEGATIVE	1.01-1.02	Negative	Positive	Negative	Negative	two or more	two or more	1	two or more	14	14 years old or minus
P-048	43	overweight	married	1	1	1	1 a 2	0	0	Yes	No	Yes	No	No	2021-06-05	NEGATIVE	LSIL	68	HPV-HR	only one virus type	16	HPV-HR	only one virus type	300.8	0.39	ABUNDANT	1.02	5	Negativo	NEGATIVE	NEGATIVE	NEGATIVE	NEGATIVE	NEGATIVE	1.01-1.02	Negative	Negative	Negative	Negative	One	one	0	zero	14	14 years old or minus
FSB-720	43	Obesity 2	no data	1	1	0	None	0	1	No	No	Yes			2021-06-05	NEGATIVE	LSIL	58	HPV-HR	only one virus type	45	HPV-HR	only one virus type	61.9	1.63															One	zero	0	one	13	14 years old or minus
P-055	75	Obesity 1	widow	1	1	8	3 or more	0	0	No	No	Yes	No	No	2021-06-05	POSITIVE	LSIL	x	HPV-X	only one virus type	Negativo	Neg	No infection	2031.8	0.55	ABUNDANT	1.03	5	Negativo	NEGATIVE	30 MG/DL	NEGATIVE	NEGATIVE	NEGATIVE	>1.02	Negative	Positive	Negative	Negative	One	two or more	0	zero	13	14 years old or minus
P-026	20	Obesity 1	married	1	1	2	1 a 2	0	0	No	No	Yes	No	No	4 or minus	NEGATIVE	LSIL	53	HPV-HR	only one virus type	52,70	IM_HPV-HR	multiple infection	51.6	1.88	Scarce	1.015	5	Negativo	NEGATIVE	30 MG/DL	NEGATIVE	NEGATIVE	NEGATIVE	1.01-1.02	Negative	Positive	Negative	Negative	One	two or more	0	zero	12	14 years old or minus
P-039	69	overweight	married	1	1	6	3 or more	2	0	No	No	No	No	No	7 or more	POSITIVE	LSIL	51	HPV-HR	only one virus type	59	HPV-HR	only one virus type	254.6	1.51	ABUNDANT	1.01	5	75 leu	NEGATIVE	100 MG/DL	NEGATIVE	NEGATIVE	NEGATIVE	1.01-1.02	Positive	Positive	Negative	Negative	One	two or more	2	zero	15	15 years old or more
P-046	39	Obesity 2	married	1	1	2	1 a 2	0	0	No	Yes	Yes	No	No	2021-06-05	POSITIVE	LSIL	61,62	IM_HPV-LR/HR	multiple infection	X	HPV-X	only one virus type	11.6	1.63	Scarce	1	7	Negativo	NEGATIVE	NEGATIVE	NEGATIVE	NEGATIVE	NEGATIVE	<1.01	Negative	Negative	Negative	Negative	One	two or more	0	zero	12	14 years old or minus
FSB-1583	31	overweight	no data	1	1	0	None	0	2	No	No	Yes			2021-06-05	NEGATIVE	LSIL	X	HPV-X	only one virus type	58,68	IM_HPV-HR	multiple infection	89.5	1.36	Scarce	1.015	5	Negativo	NEGATIVE	30 MG/DL	NEGATIVE	NEGATIVE	NEGATIVE	1.01-1.02	Negative	Positive	Negative	Negative	One	zero	0	two or more	10	14 years old or minus
P-115	57	Obesity 1	married	1	1	4	3 or more	0	0	No	Yes	Yes	No	No	2021-06-05	POSITIVE	LSIL	62	HPV-HR	only one virus type	39,33	IM_HPV-HR	multiple infection	46.2	1.15	ABUNDANT	1.015	5	Negativo	NEGATIVE	30 MG/DL	NEGATIVE	NEGATIVE	NEGATIVE	1.01-1.02	Negative	Positive	Negative	Negative	One	two or more	0	zero	13	14 years old or minus
P-011	50	Obesity 1	Divorcee	2	2021-03-02	3	3 or more	0	0	No	No	Yes	No	No	4 or minus	NEGATIVE	LSIL	53	HPV-HR	only one virus type	59	HPV-HR	only one virus type	15.9	1.74	ABUNDANT	1.005	6	Negativo	NEGATIVE	NEGATIVE	NEGATIVE	NEGATIVE	NEGATIVE	<1.01	Negative	Negative	Negative	Negative	two or more	two or more	0	zero	12	14 years old or minus
FSB-975	30	overweight	no data	1	1	1	1 a 2	0	0	No	Yes	Yes			7 or more	NEGATIVE	LSIL	45	HPV-HR	only one virus type	Negativo	Neg	No infection	192.4	1.38															One	one	0	zero	12	14 years old or minus
P-04-CHIL	21	Normal	no data	7	4 o mas	0	None	1	0	No	No	Yes			2021-06-05	NEGATIVE	LSIL	31.56	IM_HPV-HR	multiple infection	56.58	IM_HPV-HR	multiple infection	8.6	1.69	Scarce	1.02	5	10 leu	NEGATIVE	30 MG/DL	NEGATIVE	NEGATIVE	NEGATIVE	1.01-1.02	Positive	Positive	Negative	Negative	two or more	zero	1	zero	12	14 years old or minus
FSB-926	61	Obesity 2	no data	1	1	2	1 a 2	0	0	Yes	Yes	Yes			2021-06-05	NEGATIVE	LSIL	66.44	IM_HPV-LR/HR	multiple infection	NO VÁLIDA		Invalid	5	1.34	Scarce	1.005	7	Negativo	NEGATIVE	NEGATIVE	NEGATIVE	NEGATIVE	NEGATIVE	<1.01	Negative	Negative	Negative	Negative	One	two or more	0	zero	11	14 years old or minus
P-015	55	Obesity 1	married	1	1	4	3 or more	0	0	No	No	Yes	Yes	No	7 or more	NEGATIVE	LSIL	18,59	IM_HPV-HR	multiple infection	Negativo	Neg	No infection	98.4	1.74	ABUNDANT	1.015	5	10 leu	NEGATIVE	30 MG/DL	NEGATIVE	NEGATIVE	NEGATIVE	1.01-1.02	Positive	Positive	Positive	Negative	One	two or more	0	zero	12	14 years old or minus
p-154	38	overweight	spouse	3	2021-03-02	6	3 or more	0	0	No	No	Yes	No	No	2021-06-05	POSITIVE	LSIL	51	HPV-HR	only one virus type	51	HPV-HR	only one virus type	124.7	1.24	ABUNDANT	1.005	5	Negativo	NEGATIVE	NEGATIVE	NEGATIVE	NEGATIVE	NEGATIVE	<1.01	Negative	Negative	Negative	Negative	two or more	two or more	0	zero	11	14 years old or minus
P-131	50	Obesity 1	widow	2	2021-03-02	2	1 a 2	0	2	Yes	No	Yes	No	No	4 or minus	NEGATIVE	LSIL	39	HPV-HR	only one virus type	39	HPV-HR	only one virus type	55.5	1.71	ABUNDANT	1.02	5	Negativo	NEGATIVE	30 MG/DL	NEGATIVE	5-10 ERY/MICROLITRE	5-10 ERY/MICROLITRE	1.01-1.02	Negative	Positive	Negative	Positive	two or more	two or more	0	two or more	15	15 years old or more
P-025	55	Normal	married	1	1	7	3 or more	0	1	No	Yes	Yes	Yes	Yes	2021-06-05	NEGATIVE	LSIL	31,52	IM_HPV-HR	multiple infection	52,16,31	IM_HPV-HR	multiple infection	314.4	1.72	Scarce	1.01	5	Negativo	NEGATIVE	NEGATIVE	NEGATIVE	NEGATIVE	NEGATIVE	1.01-1.02	Negative	Negative	Positive	Negative	One	two or more	0	one	15	15 years old or more
P-12-CHIL	24	overweight	no data	1	1	0	None	0	0	Yes	Yes	Yes			2021-06-05	POSITIVE	LSIL	NEGATIVO	Neg	No infection	16,33,6	IM_HPV-LR/HR	multiple infection	116.2	2.01	Scarce	1.015	5	Negativo	NEGATIVE	NEGATIVE	NEGATIVE	NEGATIVE	NEGATIVE	1.01-1.02	Negative	Negative	Negative	Negative	One	zero	0	zero	11	14 years old or minus
P-096	47	Normal	widow	1	1	0	None	0	0	No	No	No	Yes	Yes	2021-06-05	NEGATIVE	LSIL	59	HPV-HR	only one virus type	51,59	IM_HPV-HR	multiple infection	473.5	1.48	ABUNDANT	1.005	6	Negativo	NEGATIVE	30 MG/DL	NEGATIVE	50 ERY/MICROLITRE	5-10 ERY/MICROLITRE	<1.01	Negative	Positive	Positive	Positive	One	zero	0	zero	12	14 years old or minus
P-019	40	Obesity 2	married	2	2021-03-02	0	None	1	0	Yes	No	Yes	No	No	2021-06-05	NEGATIVE	LSIL	59	HPV-HR	only one virus type	59,43	IM_HPV-LR/HR	multiple infection	738	1.76	ABUNDANT	1.015	7	10 leu	NEGATIVE	NEGATIVE	NEGATIVE	NEGATIVE	NEGATIVE	1.01-1.02	Positive	Negative	Negative	Negative	two or more	zero	1	zero	12	14 years old or minus
P-111	66	overweight	married	1	1	0	None	0	0	Yes	No	Yes	No	No	2021-06-05	NEGATIVE	LSIL	52,66,70,54	IM_HPV-LR/HR	multiple infection	39,52,70,66	IM_HPV-HR	multiple infection	190	1.77	ABUNDANT	1.02	5	10 leu	NEGATIVE	NEGATIVE	NEGATIVE	5-10 ERY/MICROLITRE	25 ERY/MICROLITRE	1.01-1.02	Positive	Negative	Negative	Positive	One	zero	0	zero	15	15 years old or more
P-06-CHIL	20	Normal	no data	2	2021-03-02	1	1 a 2	0	0	No	No	No			2021-06-05	NEGATIVE	LSIL	16	HPV-HR	only one virus type	NEGATIVO	Neg	No infection	106.6	1.84	Scarce	1.02	5	Negativo	NEGATIVE	30 MG/DL	NEGATIVE	NEGATIVE	NEGATIVE	1.01-1.02	Negative	Positive	Negative	Negative	two or more	one	0	zero	12	14 years old or minus
P-045	64	overweight	married	1	1	8	3 or more	2	0	No	No	Yes	No	No	7 or more	NEGATIVE	LSIL	35	HPV-HR	only one virus type	39	HPV-HR	only one virus type	26.1	1.19	ABUNDANT	1	6	Negativo	NEGATIVE	NEGATIVE	NEGATIVE	NEGATIVE	NEGATIVE	<1.01	Negative	Negative	Negative	Negative	One	two or more	2	zero	13	14 years old or minus
P-101	45	overweight	spouse	3	2021-03-02	4	3 or more	1	0	Yes	Yes	Yes	No	Yes	2021-06-05	POSITIVE	LSIL	x	HPV-X	only one virus type	52,58	IM_HPV-HR	multiple infection	56.9	1.16	ABUNDANT	1.02	5	Negativo	NEGATIVE	NEGATIVE	NEGATIVE	NEGATIVE	NEGATIVE	1.01-1.02	Negative	Negative	Negative	Negative	two or more	two or more	1	zero	14	14 years old or minus
P-121	60	overweight	married	1	1	6	3 or more	0	0	Yes	No	No	Yes	No	7 or more	NEGATIVE	LSIL	31,35,51,52	IM_HPV-HR	multiple infection	51,52	IM_HPV-HR	multiple infection	244.2	1.83	Scarce	1.01	6	Negativo	NEGATIVE	30 MG/DL	NEGATIVE	NEGATIVE	NEGATIVE	1.01-1.02	Negative	Positive	Negative	Negative	One	two or more	0	zero	14	14 years old or minus
P-053	72	Obesity 1	widow	2	2021-03-02	6	3 or more	2	0	No	No	Yes	Yes	Yes	2021-06-05	POSITIVE	LSIL	59	HPV-HR	only one virus type	16	HPV-HR	only one virus type	69.9	0.69	ABUNDANT	1.015	5	Negativo	NEGATIVE	30 MG/DL	NEGATIVE	NEGATIVE	NEGATIVE	1.01-1.02	Negative	Positive	Positive	Negative	two or more	two or more	2	zero	12	14 years old or minus
P-01-CHIL	22	Normal	no data	2	2021-03-02	0	None	1	0	Yes	Yes	Yes			2021-06-05	NEGATIVE	LSIL	16	HPV-HR	only one virus type	16,51,58,6,59	IM_HPV-LR/HR	multiple infection	18.4	1.83	Scarce	1.025	6	10 leu	NEGATIVE	NEGATIVE	NEGATIVE	NEGATIVE	NEGATIVE	>1.02	Positive	Negative	Negative	Negative	two or more	zero	1	zero	11	14 years old or minus
